# Supplementary material for: Insights into Acinetobacter baumannii AMA205's Unprecedented Antibiotic Resistance
Source: Preprints.org preprint supplement (doi:10.20944/preprints202409.2016.v1), 2024-09-25
Supplement: Supplementary file 1 [file supplementary]

## Sheet: AMA205_Virulence
Table S3 - Virulence genes identified in A. baumannii AMA205
Database: VFDB (Virulence Factor Database) - Set A
BLAST protein parameter: evalue: 10-6, cover: 80%, identity: 80%
AMA205 Genes	Protein	Identity% against to VFDB set A
AMA205_00144	(tagX)_type_VI-associated_gene_X,_peptidoglycan_hydrolase_[T6SS_(VF1337)_-_Effector_delivery_system_(VFC0086)]_[Acinetobacter_baumannii_ACICU]	100000
AMA205_00146	(tssL)_type_IVB_secretion_system_protein_TssL_[T6SS_(VF1337)_-_Effector_delivery_system_(VFC0086)]_[Acinetobacter_baumannii_ACICU]	99254
AMA205_00147	(tssK)_type_VI_secretion_system_baseplate_subunit_TssK_[T6SS_(VF1337)_-_Effector_delivery_system_(VFC0086)]_[Acinetobacter_baumannii_ACICU]	99339
AMA205_00148	(tssA)_type_VI_secretion_system_protein_TssA_[T6SS_(VF1337)_-_Effector_delivery_system_(VFC0086)]_[Acinetobacter_baumannii_ACICU]	99725
AMA205_00149	(clpV/tssH)_type_VI_secretion_system_ATPase_TssH_[T6SS_(VF1337)_-_Effector_delivery_system_(VFC0086)]_[Acinetobacter_baumannii_ACICU]	99439
AMA205_00154	(tssM)_type_VI_secretion_system_membrane_subunit_TssM_[T6SS_(VF1337)_-_Effector_delivery_system_(VFC0086)]_[Acinetobacter_baumannii_ACICU]	99608
AMA205_00156	(tssG)_type_VI_secretion_system_baseplate_subunit_TssG_[T6SS_(VF1337)_-_Effector_delivery_system_(VFC0086)]_[Acinetobacter_baumannii_ACICU]	98795
AMA205_00157	(tssF)_type_VI_secretion_system_baseplate_subunit_TssF_[T6SS_(VF1337)_-_Effector_delivery_system_(VFC0086)]_[Acinetobacter_baumannii_ACICU]	99668
AMA205_00158	(tssE)_type_VI_secretion_system_baseplate_subunit_TssE_[T6SS_(VF1337)_-_Effector_delivery_system_(VFC0086)]_[Acinetobacter_baumannii_ACICU]	100000
AMA205_00159	(hcp/tssD)_type_VI_secretion_system_tube_protein_Hcp_[T6SS_(VF1337)_-_Effector_delivery_system_(VFC0086)]_[Acinetobacter_baumannii_ACICU]	100000
AMA205_00160	(tssC)_type_VI_secretion_system_contractile_sheath_large_subunit_[T6SS_(VF1337)_-_Effector_delivery_system_(VFC0086)]_[Acinetobacter_baumannii_ACICU]	100000
AMA205_00161	(tssB)_type_VI_secretion_system_contractile_sheath_small_subunit_[T6SS_(VF1337)_-_Effector_delivery_system_(VFC0086)]_[Acinetobacter_baumannii_ACICU]	100000
AMA205_00195	(vgrG/tssI)_type_VI_secretion_system_tip_protein_VgrG_[T6SS_(VF1337)_-_Effector_delivery_system_(VFC0086)]_[Acinetobacter_baumannii_ACICU]	88037
AMA205_00196	(vgrG/tssI)_type_VI_secretion_system_tip_protein_VgrG_[T6SS_(VF1337)_-_Effector_delivery_system_(VFC0086)]_[Acinetobacter_baumannii_ACICU]	98611
AMA205_00541	(ACICU_RS04610)_hypothetical_protein_[HemO_cluster_(VF0636)_-_Nutritional/Metabolic_factor_(VFC0272)]_[Acinetobacter_baumannii_ACICU]	92308
AMA205_00542	(ACICU_RS04565)_LysR_family_transcriptional_regulator_[HemO_cluster_(VF0636)_-_Nutritional/Metabolic_factor_(VFC0272)]_[Acinetobacter_baumannii_ACICU]	98649
AMA205_00676	(pilT)_type_IV_pilus_twitching_motility_protein_PilT_[TFP_(VF1334)_-_Adherence_(VFC0001)]_[Acinetobacter_baumannii_ACICU]	100000
AMA205_00676	(pilT)_twitching_motility_protein_PilT_[Type_IV_pili_(VF0082)_-_Adherence_(VFC0001)]_[Pseudomonas_aeruginosa_PAO1]	84302
AMA205_00677	(pilU)_PilT/PilU_family_type_4a_pilus_ATPase_[TFP_(VF1334)_-_Adherence_(VFC0001)]_[Acinetobacter_baumannii_ACICU]	99194
AMA205_00912	(gspE1)_general_secretion_pathway_protein_E_[T2SS_(VF1335)_-_Effector_delivery_system_(VFC0086)]_[Acinetobacter_baumannii_ACICU]	99798
AMA205_01006	(pilF)_type_IV_pilus_biogenesis/stability_protein_PilW_[TFP_(VF1334)_-_Adherence_(VFC0001)]_[Acinetobacter_baumannii_ACICU]	100000
AMA205_01073	(lpxL)_lauroyl_acyltransferase_[LPS_(VF0466)_-_Immune_modulation_(VFC0258)]_[Acinetobacter_baumannii_ACICU]	98714
AMA205_01074	(lpsB)_glycosyltransferase_family_4_protein_[LPS_(VF0466)_-_Immune_modulation_(VFC0258)]_[Acinetobacter_baumannii_ACICU]	98634
AMA205_01078	(fimV)_hypothetical_protein_[TFP_(VF1334)_-_Adherence_(VFC0001)]_[Acinetobacter_baumannii_ACICU]	98899
AMA205_01137	(gspG)_general_secretion_pathway_protein_G_[T2SS_(VF1335)_-_Effector_delivery_system_(VFC0086)]_[Acinetobacter_baumannii_ACICU]	100000
AMA205_01138	(gspF)_general_secretion_pathway_protein_F_[T2SS_(VF1335)_-_Effector_delivery_system_(VFC0086)]_[Acinetobacter_baumannii_ACICU]	100000
AMA205_01177	(pilB)_type_IV-A_pilus_assembly_ATPase_PilB_[TFP_(VF1334)_-_Adherence_(VFC0001)]_[Acinetobacter_baumannii_ACICU]	99298
AMA205_01178	(pilC)_type_II_secretion_system_F_family_protein_[TFP_(VF1334)_-_Adherence_(VFC0001)]_[Acinetobacter_baumannii_ACICU]	99755
AMA205_01179	(gspO/pilD)_A24_family_peptidase_[TFP_(VF1334)_-_Adherence_(VFC0001)]_[Acinetobacter_baumannii_ACICU]	97552
AMA205_01238	(gspD)_general_secretion_pathway_protein_D_[T2SS_(VF1335)_-_Effector_delivery_system_(VFC0086)]_[Acinetobacter_baumannii_ACICU]	92651
AMA205_01239	(gspC)_general_secretion_pathway_protein_C_[T2SS_(VF1335)_-_Effector_delivery_system_(VFC0086)]_[Acinetobacter_baumannii_ACICU]	99281
AMA205_01240	(gspN)_type_II_secretion_system_protein_N_[T2SS_(VF1335)_-_Effector_delivery_system_(VFC0086)]_[Acinetobacter_baumannii_ACICU]	100000
AMA205_01270	(pbpG)_D-alanyl-D-alanine_endopeptidase_PBP7/8_[PbpG_(VF0468)_-_Immune_modulation_(VFC0258)]_[Acinetobacter_baumannii_ACICU]	99701
AMA205_01272	(pilS)_PAS_domain-containing_sensor_histidine_kinase_[TFP_(VF1334)_-_Adherence_(VFC0001)]_[Acinetobacter_baumannii_ACICU]	99042
AMA205_01273	(pilR)_sigma-54_dependent_transcriptional_regulator_[TFP_(VF1334)_-_Adherence_(VFC0001)]_[Acinetobacter_baumannii_ACICU]	99154
AMA205_01340	(tsaP)_LysM_peptidoglycan-binding_domain-containing_protein_[TFP_(VF1334)_-_Adherence_(VFC0001)]_[Acinetobacter_baumannii_ACICU]	99479
AMA205_01393	(abaR)_DNA-binding_HTH_domain-containing_protein_[Quorom_sensing_(VF0471)_-_Biofilm_(VFC0271)]_[Acinetobacter_baumannii_ACICU]	98319
AMA205_01395	(abaI)_N-acyl-L-homoserine_lactone_synthetase_[Quorom_sensing_(VF0471)_-_Biofilm_(VFC0271)]_[Acinetobacter_baumannii_ACICU]	99454
AMA205_01441	(ACICU_RS00500)_phosphomannomutase/phosphoglucomutase_[Capsule_(VF0465)_-_Immune_modulation_(VFC0258)]_[Acinetobacter_baumannii_ACICU]	98465
AMA205_01442	(galE)_UDP-glucose_4-epimerase_GalE_[Capsule_(VF0465)_-_Immune_modulation_(VFC0258)]_[Acinetobacter_baumannii_ACICU]	96450
AMA205_01443	(pgi)_glucose-6-phosphate_isomerase_[Capsule_(VF0465)_-_Immune_modulation_(VFC0258)]_[Acinetobacter_baumannii_ACICU]	93705
AMA205_01444	(ACICU_RS00485)_nucleotide_sugar_dehydrogenase_[Capsule_(VF0465)_-_Immune_modulation_(VFC0258)]_[Acinetobacter_baumannii_ACICU]	92381
AMA205_01445	(galU)_UTP--glucose-1-phosphate_uridylyltransferase_GalU_[Capsule_(VF0465)_-_Immune_modulation_(VFC0258)]_[Acinetobacter_baumannii_ACICU]	96907
AMA205_01458	(tviB)_Vi_polysaccharide_biosynthesis_UDP-N-acetylglucosamine_C-6_dehydrogenase_TviB_[Capsule_(VF0465)_-_Immune_modulation_(VFC0258)]_[Acinetobacter_baumannii_ACICU]	82075
AMA205_01459	(ACICU_RS00405)_polysaccharide_biosynthesis/export_family_protein_[Capsule_(VF0465)_-_Immune_modulation_(VFC0258)]_[Acinetobacter_baumannii_ACICU]	98634
AMA205_01460	(ACICU_RS00400)_low_molecular_weight_phosphotyrosine_protein_phosphatase_[Capsule_(VF0465)_-_Immune_modulation_(VFC0258)]_[Acinetobacter_baumannii_ACICU]	95775
AMA205_01461	(ACICU_RS00395)_polysaccharide_biosynthesis_tyrosine_autokinase_[Capsule_(VF0465)_-_Immune_modulation_(VFC0258)]_[Acinetobacter_baumannii_ACICU]	95742
AMA205_01468	(plc1)_phospholipase_C_[Phospholipase_C_(VF0470)_-_Exotoxin_(VFC0235)]_[Acinetobacter_baumannii_ACICU]	98148
AMA205_01469	(plc1)_phospholipase_C_[Phospholipase_C_(VF0470)_-_Exotoxin_(VFC0235)]_[Acinetobacter_baumannii_ACICU]	98058
AMA205_01646	(vgrG/tssI)_type_VI_secretion_system_tip_protein_VgrG_[T6SS_(VF1337)_-_Effector_delivery_system_(VFC0086)]_[Acinetobacter_baumannii_ACICU]	94559
AMA205_01685	(lpxC)_UDP-3-O-acyl-N-acetylglucosamine_deacetylase_[LPS_(VF0466)_-_Immune_modulation_(VFC0258)]_[Acinetobacter_baumannii_ACICU]	100000
AMA205_01859	(pilM)_pilus_assembly_protein_PilM_[TFP_(VF1334)_-_Adherence_(VFC0001)]_[Acinetobacter_baumannii_ACICU]	99716
AMA205_01860	(pilN)_PilN_domain-containing_protein_[TFP_(VF1334)_-_Adherence_(VFC0001)]_[Acinetobacter_baumannii_ACICU]	100000
AMA205_01861	(pilO)_type_4a_pilus_biogenesis_protein_PilO_[TFP_(VF1334)_-_Adherence_(VFC0001)]_[Acinetobacter_baumannii_ACICU]	99187
AMA205_01862	(pilP)_pilus_assembly_protein_PilP_[TFP_(VF1334)_-_Adherence_(VFC0001)]_[Acinetobacter_baumannii_ACICU]	97714
AMA205_01863	(pilQ)_type_IV_pilus_secretin_PilQ_[TFP_(VF1334)_-_Adherence_(VFC0001)]_[Acinetobacter_baumannii_ACICU]	99861
AMA205_01883	(fimU)_GspH/FimT_family_pseudopilin_[TFP_(VF1334)_-_Adherence_(VFC0001)]_[Acinetobacter_baumannii_ACICU]	99363
AMA205_01884	(pilV)_type_IV_pilus_modification_protein_PilV_[TFP_(VF1334)_-_Adherence_(VFC0001)]_[Acinetobacter_baumannii_ACICU]	100000
AMA205_01885	(pilW)_PilW_family_protein_[TFP_(VF1334)_-_Adherence_(VFC0001)]_[Acinetobacter_baumannii_ACICU]	98498
AMA205_01886	(pilX)_hypothetical_protein_[TFP_(VF1334)_-_Adherence_(VFC0001)]_[Acinetobacter_baumannii_ACICU]	99632
AMA205_01887	(pilY1)_VWA_domain-containing_protein_[TFP_(VF1334)_-_Adherence_(VFC0001)]_[Acinetobacter_baumannii_ACICU]	99766
AMA205_01888	(ACICU_RS16840)_prepilin-type_N-terminal_cleavage/methylation_domain-containing_protein_[TFP_(VF1334)_-_Adherence_(VFC0001)]_[Acinetobacter_baumannii_ACICU]	98750
AMA205_01889	(pilE)_type_IV_pilin_protein_[TFP_(VF1334)_-_Adherence_(VFC0001)]_[Acinetobacter_baumannii_ACICU]	100000
AMA205_02072	(plcD)_phosphatidylserine/phosphatidylglycerophosphate/cardiolipin_synthase_[Phospholipase_D_(VF0469)_-_Exotoxin_(VFC0235)]_[Acinetobacter_baumannii_ACICU]	99630
AMA205_02191	(fimT)_GspH/FimT_family_pseudopilin_[TFP_(VF1334)_-_Adherence_(VFC0001)]_[Acinetobacter_baumannii_ACICU]	99415
AMA205_02192	(ompA)_outer_membrane_protein_OmpA_[OmpA_(VF0464)_-_Immune_modulation_(VFC0258)]_[Acinetobacter_baumannii_ACICU]	99438
AMA205_02218	(pilG)_twitching_motility_response_regulator_PilG_[TFP_(VF1334)_-_Adherence_(VFC0001)]_[Acinetobacter_baumannii_ACICU]	100000
AMA205_02219	(pilH)_response_regulator_[TFP_(VF1334)_-_Adherence_(VFC0001)]_[Acinetobacter_baumannii_ACICU]	100000
AMA205_02220	(pilI)_chemotaxis_protein_CheW_[TFP_(VF1334)_-_Adherence_(VFC0001)]_[Acinetobacter_baumannii_ACICU]	99438
AMA205_02221	(pilJ)_methyl-accepting_chemotaxis_protein_[TFP_(VF1334)_-_Adherence_(VFC0001)]_[Acinetobacter_baumannii_ACICU]	99855
AMA205_02441	(lpxM)_lysophospholipid_acyltransferase_family_protein_[LPS_(VF0466)_-_Immune_modulation_(VFC0258)]_[Acinetobacter_baumannii_ACICU]	100000
AMA205_02611	(bauF)_siderophore-interacting_protein_[Acinetobactin_(VF0467)_-_Nutritional/Metabolic_factor_(VFC0272)]_[Acinetobacter_baumannii_ACICU]	98252
AMA205_02612	(basA)_acinetobactin_biosynthesis_protein_[Acinetobactin_(VF0467)_-_Nutritional/Metabolic_factor_(VFC0272)]_[Acinetobacter_baumannii_ACICU]	95610
AMA205_02613	(basB)_non-ribosomal_peptide_synthetase_with_condensation_and_peptidyl_carrier_protein_domains_[Acinetobactin_(VF0467)_-_Nutritional/Metabolic_factor_(VFC0272)]_[Acinetobacter_baumannii_ACICU]	95414
AMA205_02615	(bauD)_ferric_siderophore_ABC_transporter,_permease_protein_BauD_[Acinetobactin_(VF0467)_-_Nutritional/Metabolic_factor_(VFC0272)]_[Acinetobacter_baumannii_ACICU]	99000
AMA205_02616	(bauC)_ferric_siderophore_ABC_transporter,_permease_protein_BauC_[Acinetobactin_(VF0467)_-_Nutritional/Metabolic_factor_(VFC0272)]_[Acinetobacter_baumannii_ACICU]	99365
AMA205_02617	(bauE)_ferric_siderophore_ABC_transporter,_ATP-binding_protein_BauE_[Acinetobactin_(VF0467)_-_Nutritional/Metabolic_factor_(VFC0272)]_[Acinetobacter_baumannii_ACICU]	98828
AMA205_02618	(bauB)_ferric_siderophore_ABC_transporter,_periplasmic_siderophore-binding_protein_[Acinetobactin_(VF0467)_-_Nutritional/Metabolic_factor_(VFC0272)]_[Acinetobacter_baumannii_ACICU]	98758
AMA205_02619	(bauA)_TonB-dependent_siderophore_receptor_BauA_[Acinetobactin_(VF0467)_-_Nutritional/Metabolic_factor_(VFC0272)]_[Acinetobacter_baumannii_ACICU]	99467
AMA205_02620	(basC)_acinetobactin_biosynthesis_protein_BasC_[Acinetobactin_(VF0467)_-_Nutritional/Metabolic_factor_(VFC0272)]_[Acinetobacter_baumannii_ACICU]	99312
AMA205_02621	(basD)_acinetobactin_biosynthesis_protein_BasD_[Acinetobactin_(VF0467)_-_Nutritional/Metabolic_factor_(VFC0272)]_[Acinetobacter_baumannii_ACICU]	96224
AMA205_02622	(entE)_non-ribosomal_peptide_synthetase_adenylate-forming_enzyme_of_acinetobactin_synthesis_[Acinetobactin_(VF0467)_-_Nutritional/Metabolic_factor_(VFC0272)]_[Acinetobacter_baumannii_ACICU]	98524
AMA205_02623	(basF)_aryl_carrier_protein_BasF_[Acinetobactin_(VF0467)_-_Nutritional/Metabolic_factor_(VFC0272)]_[Acinetobacter_baumannii_ACICU]	99654
AMA205_02624	(basG)_acinetobactin_biosynthesis_protein_BasF_[Acinetobactin_(VF0467)_-_Nutritional/Metabolic_factor_(VFC0272)]_[Acinetobacter_baumannii_ACICU]	99478
AMA205_02626	(barA)_siderophore_efflux_system_of_the_ABC_superfamily_[Acinetobactin_(VF0467)_-_Nutritional/Metabolic_factor_(VFC0272)]_[Acinetobacter_baumannii_ACICU]	96642
AMA205_02627	(barB)_siderophore_efflux_system_of_the_ABC_superfamily_[Acinetobactin_(VF0467)_-_Nutritional/Metabolic_factor_(VFC0272)]_[Acinetobacter_baumannii_ACICU]	98870
AMA205_02628	(basH)_non-ribosomal_peptide_biosynthesis_thioesterase_BasH_[Acinetobactin_(VF0467)_-_Nutritional/Metabolic_factor_(VFC0272)]_[Acinetobacter_baumannii_ACICU]	98361
AMA205_02629	(basI)_phosphopantetheinyl_transferase_component_of_acinetobactin_biosynthesis_protein_BasI_[Acinetobactin_(VF0467)_-_Nutritional/Metabolic_factor_(VFC0272)]_[Acinetobacter_baumannii_ACICU]	97211
AMA205_02630	(basJ)_acinetobactin_biosynthesis_protein_BasJ_[Acinetobactin_(VF0467)_-_Nutritional/Metabolic_factor_(VFC0272)]_[Acinetobacter_baumannii_ACICU]	98972
AMA205_02700	(adeH)_outer_membrane_protein_[AdeFGH_efflux_pump_(VF0504)_-_Biofilm_(VFC0271)]_[Acinetobacter_baumannii_ACICU]	98963
AMA205_02701	(adeG)_cation/multidrug_efflux_pump_[AdeFGH_efflux_pump_(VF0504)_-_Biofilm_(VFC0271)]_[Acinetobacter_baumannii_ACICU]	99528
AMA205_02702	(adeF)_membrane-fusion_protein_[AdeFGH_efflux_pump_(VF0504)_-_Biofilm_(VFC0271)]_[Acinetobacter_baumannii_ACICU]	99507
AMA205_02718	(gspE2)_putative_secretion_pathway_ATPase_[T2SS_(VF1335)_-_Effector_delivery_system_(VFC0086)]_[Acinetobacter_baumannii_ACICU]	100000
AMA205_02751	(gspL)_general_secretion_pathway_protein_L_[T2SS_(VF1335)_-_Effector_delivery_system_(VFC0086)]_[Acinetobacter_baumannii_ACICU]	99208
AMA205_02752	(gspM)_general_secretion_pathway_protein_M_[T2SS_(VF1335)_-_Effector_delivery_system_(VFC0086)]_[Acinetobacter_baumannii_ACICU]	100000
AMA205_02799	(csuA/B)_Csu_pilus_major_pilin_subunit_CsuA/B_[Csu_fimbriae_(VF0461)_-_Biofilm_(VFC0271)]_[Acinetobacter_baumannii_ACICU]	100000
AMA205_02801	(csuB)_Csu_pilus_subunit_CsuB_[Csu_fimbriae_(VF0461)_-_Biofilm_(VFC0271)]_[Acinetobacter_baumannii_ACICU]	97674
AMA205_02802	(csuC)_Csu_pilus_chaperone_protein_CsuC__[Csu_fimbriae_(VF0461)_-_Biofilm_(VFC0271)]_[Acinetobacter_baumannii_ACICU]	98917
AMA205_02803	(csuD)_Csu_pilus_usher_protein_CsuD_[Csu_fimbriae_(VF0461)_-_Biofilm_(VFC0271)]_[Acinetobacter_baumannii_ACICU]	99760
AMA205_02804	(csuE)_Csu_pilus_tip_adhesin_CsuE_[Csu_fimbriae_(VF0461)_-_Biofilm_(VFC0271)]_[Acinetobacter_baumannii_ACICU]	99410
AMA205_02853	(pgaB)_poly-beta-1,6-N-acetyl-D-glucosamine_N-deacetylase_PgaB_[PNAG_(VF0472)_-_Biofilm_(VFC0271)]_[Acinetobacter_baumannii_ACICU]	99179
AMA205_02854	(pgaC)_poly-beta-1,6_N-acetyl-D-glucosamine_synthase_[PNAG_(VF0472)_-_Biofilm_(VFC0271)]_[Acinetobacter_baumannii_ACICU]	99759
AMA205_02855	(pgaD)_poly-beta-1,6-N-acetyl-D-glucosamine_biosynthesis_protein_PgaD_[PNAG_(VF0472)_-_Biofilm_(VFC0271)]_[Acinetobacter_baumannii_ACICU]	99351
AMA205_02972	(plc2)_phospholipase_C_[Phospholipase_C_(VF0470)_-_Exotoxin_(VFC0235)]_[Acinetobacter_baumannii_ACICU]	98787
AMA205_03036	(lpxD)_UDP-3-O-(3-hydroxymyristoyl)glucosamine_N-acyltransferase_[LPS_(VF0466)_-_Immune_modulation_(VFC0258)]_[Acinetobacter_baumannii_ACICU]	99157
AMA205_03038	(lpxA)_acyl-ACP--UDP-N-acetylglucosamine_O-acyltransferase_[LPS_(VF0466)_-_Immune_modulation_(VFC0258)]_[Acinetobacter_baumannii_ACICU]	100000
AMA205_03242	(katA)_catalase_[KatA_(VF0454)_-_Stress_survival_(VFC0282)]_[Neisseria_meningitidis_MC58]	84661
AMA205_03596	(lpxB)_lipid-A-disaccharide_synthase_[LPS_(VF0466)_-_Immune_modulation_(VFC0258)]_[Acinetobacter_baumannii_ACICU]	100000
AMA205_03880	(gspK)_general_secretion_pathway_protein_K_[T2SS_(VF1335)_-_Effector_delivery_system_(VFC0086)]_[Acinetobacter_baumannii_ACICU]	99060
AMA205_03882	(gspI)_general_secretion_pathway_protein_I_[T2SS_(VF1335)_-_Effector_delivery_system_(VFC0086)]_[Acinetobacter_baumannii_ACICU]	100000
AMA205_03883	(gspH)_general_secretion_pathway_protein_H_[T2SS_(VF1335)_-_Effector_delivery_system_(VFC0086)]_[Acinetobacter_baumannii_ACICU]	100000

## Sheet: OC locus
Table S3 - OC Locus identified in Acinetobacter baumannii AMA205
Program: Kaptive
Parameter: default
Assembly	Best match locus	Match confidence	Coverage	Identity	Length discrepancy	Expected genes in locus	Expected genes in locus, details
AMA205_ch.fsa	OCL10	High	100.00%	99.97%	+886 bp	10 / 11 (90.9%)	OCL10_01_gtrOC1,100.0%;OCL10_02_gtrOC2,100.0%;OCL10_03_pda1,100.0%;OCL10_04_gtrOC3,99.609%;OCL10_05_gtrOC4,100.0%;OCL10_06_orf1(ghy),100.0%;OCL10_07_gtrOC29,100.0%;OCL10_08_gtrOC30,100.0%;OCL10_10_glf,99.733%;OCL10_11_gtrOC7,100.0%

## Sheet: K Locus
Table S3 - K Locus identified in Acinetobacter baumannii AMA205
Program: Kaptive
Parameter: default
Assembly	Best match locus	Match confidence	Coverage	Identity	Length discrepancy	Expected genes in locus	Expected genes in locus, details
AMA205_ch.fsa	KL9	Very high	100.00%	98.86%	+1 bp	21 / 21 (100%)	KL9_01_wzc,98.628%;KL9_02_wzb,98.601%;KL9_03_wza,96.247%;KL9_04_gna1,100.0%;KL9_05_gne2,99.712%;KL9_06_wzx_KL9,99.759%;KL9_07_wzy_KL9,100.0%;KL9_08_gtr21,99.491%;KL9_09_gtr22,100.0%;KL9_10_fnlA,100.0%;KL9_11_fnlB,100.0%;KL9_12_fnlC,100.0%;KL9_13_gtr20,100.0%;KL9_14_qnr3,97.756%;KL9_15_itrB2,99.407%;KL9_16_itrA3,100.0%;KL9_17_galU,99.315%;KL9_18_ugd,99.525%;KL9_19_gpi,100.0%;KL9_20_gne1,99.705%;KL…
